# Supplementary material
Source: publisher site journal article supplement (https://www.dovepress.com/article/106653)
Supplement: Supplementary file 1 [file get_supplementary_file.php]

## Supplementary Materials

### Supplementary Figures

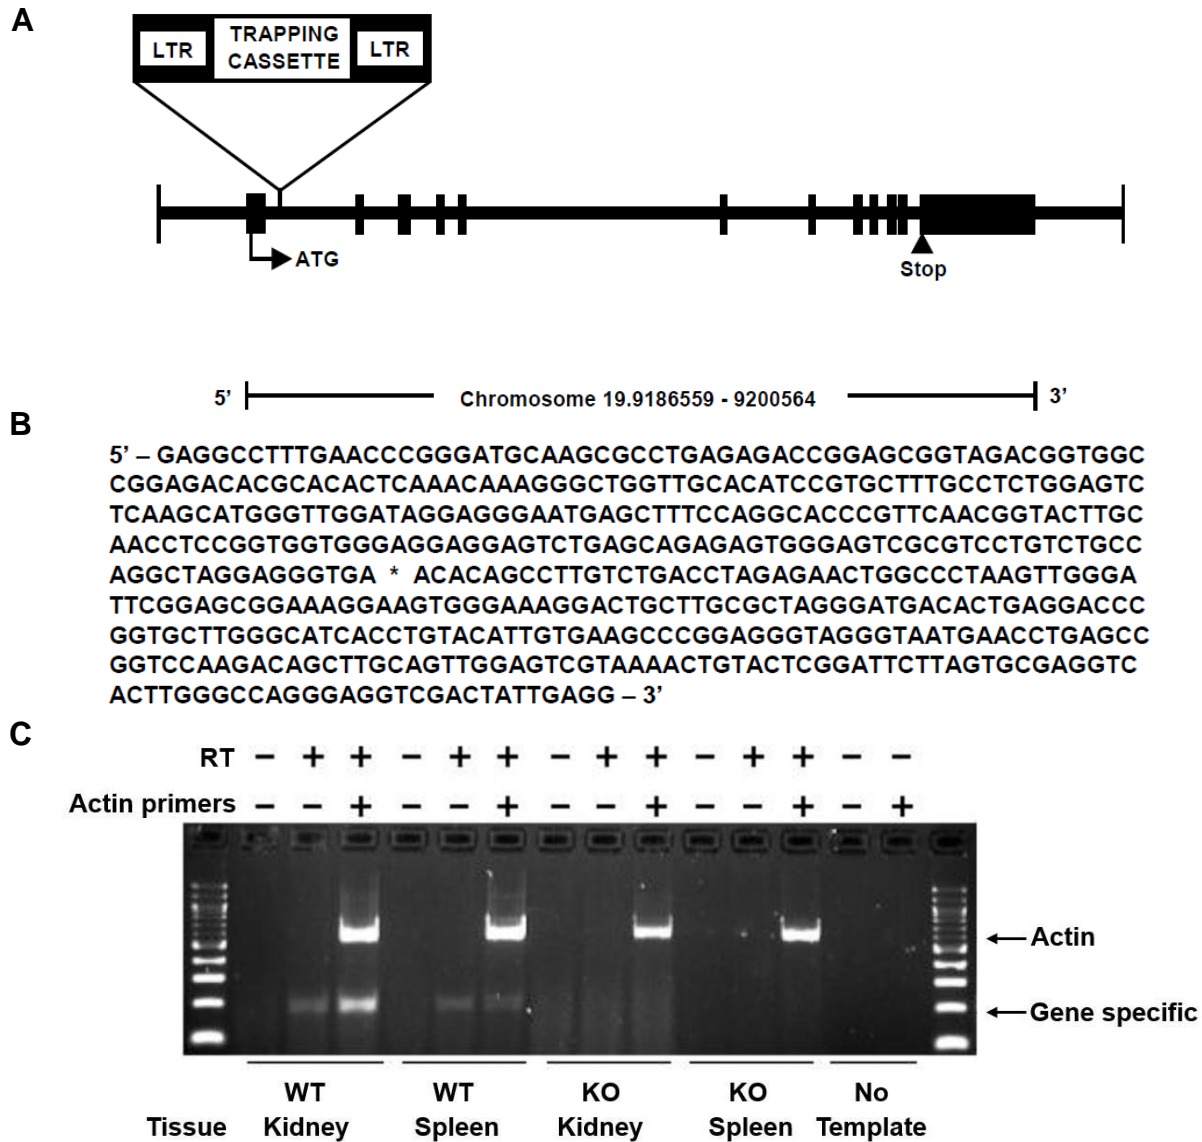

**Supplementary Figure 1. Disruption of the *Fads1* gene by gene trapping.** **A)** Schematic diagram of the *Fads1* gene showing location of the retroviral gene-trap vector insertion in Omnibank embryonic stem cell clone OST118368 (accession number M146094). This clone was generated using a vector which disrupts endogenous gene transcription through action of a splice acceptor-neomycin phosphotransferase trapping cassette. Boxes denote coding exons and lines between boxes denote introns. Location of the vector insertion site in intron 1 is shown. LTR, viral long terminal repeat; ATG, translation start codon; Stop, translation stop codon. **B)** Mouse genomic sequence obtained by inverse PCR amplification of the pro-viral insertion site. An asterisk denotes the site of insertion. **C)** RT-PCR expression analysis of *Fads1* transcript. Endogenous *Fads1* transcript was detected in the kidney and spleen of WT but not KO mice. Primers complementary to sequence in *Fads1* exons 1 and 2 were used to amplify the gene-specific product. RT-PCR analysis using primers complimentary to the mouse *beta actin* gene (accession number M12481) was performed in the same reaction to serve as an internal amplification control. Lanes labeled as No Template represent control reactions. RT, reverse transcriptase.

**A**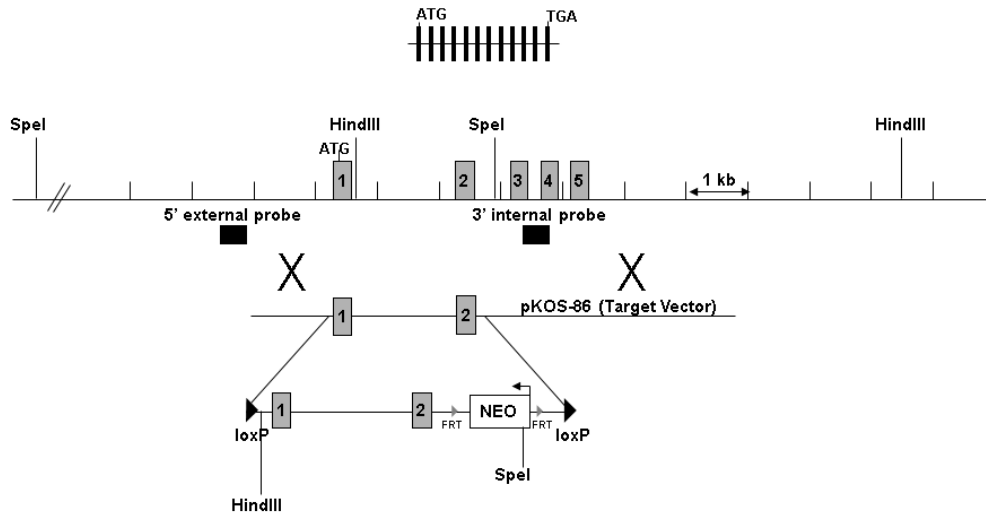**B**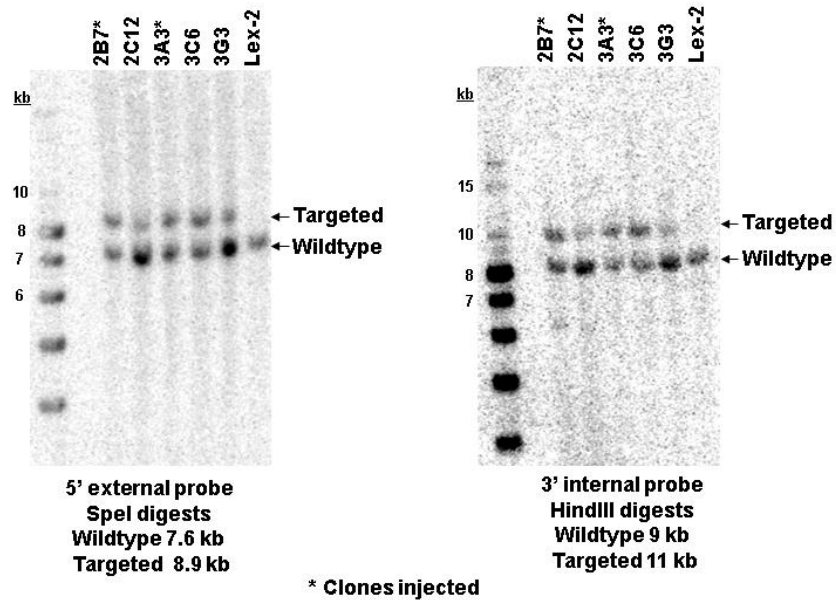

**Supplementary Figure 2. Targeted disruption of the *Fads1* gene locus by homologous recombination.** **A)** Targeting strategy used to disrupt the *Fads1* locus. Homologous recombination (represented by X) between the targeting vector and the *Fads1* gene results in the substitution of a LoxP flanked exons 1 and 2 along with a Frt flanked selection cassette. **B)** Southern hybridization indicating proper gene targeting in the embryonic stem cell clones. Clones 2B7 and 3A3 were used for blastocyst injections; Lex-2 represents untransfected embryonic stem cell DNA.

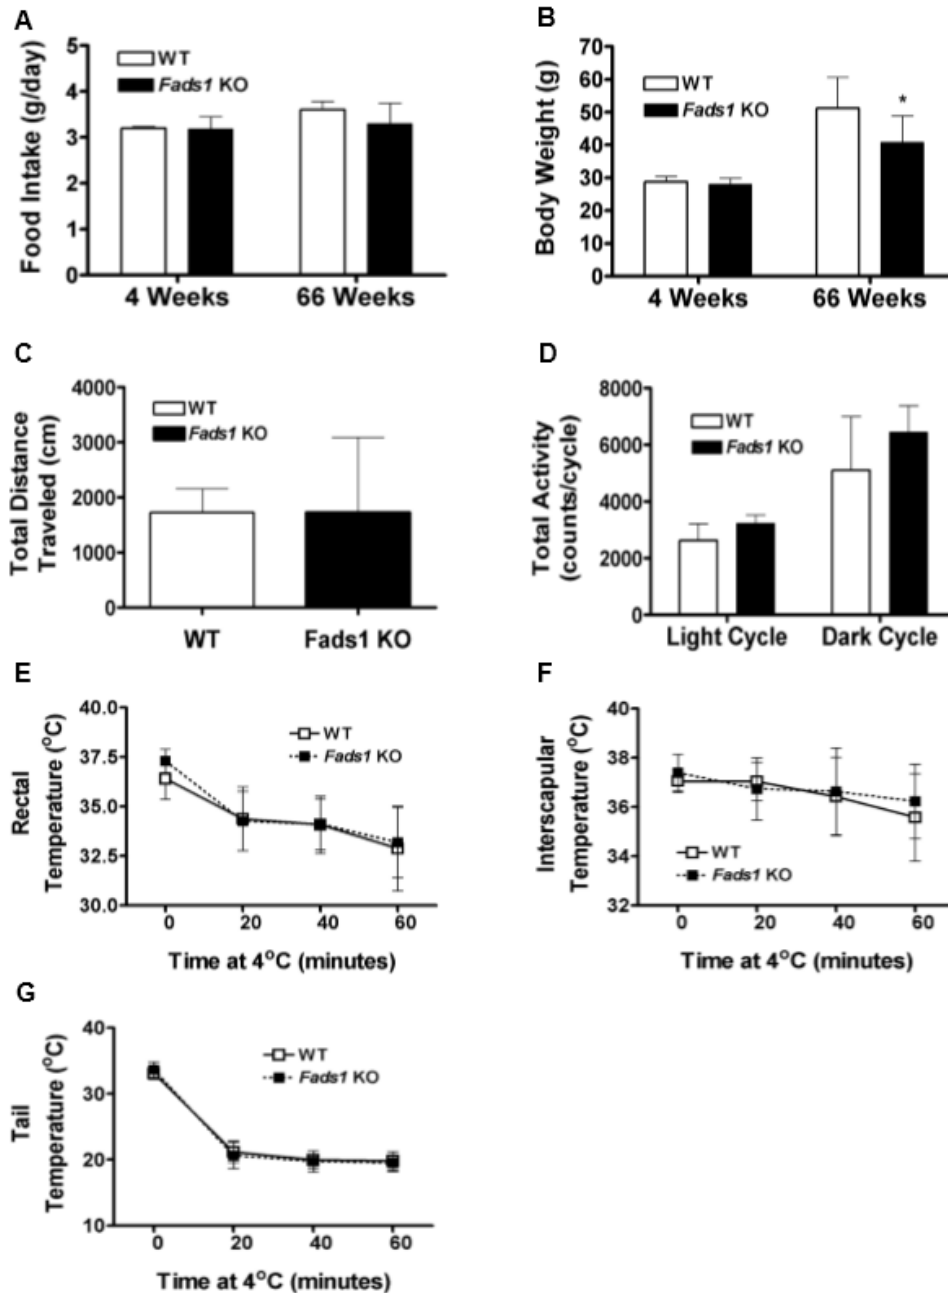

**Supplementary Figure 3. Effect of *Fads1* KO on food intake, body weight, activity levels and cold tolerance.** **A)** Intake of 45% HFD by group-housed *Fads1* KO mice and their WT littermates (2-3 mice/cage, 4 cages/genotype) between 4 and 6 weeks of age and again between 66 and 67 weeks of age. **B)** Body weights of these mice at 4 and 66 weeks of age. KO mice different from WT mice, \*  $p < 0.05$ . **C)** Total distance traveled by chow-fed, 11 week-old *Fads1* KO mice (N = 8) and their WT littermates (N = 4) measured in an open field chamber. **D)** Total activity levels of 45% HFD-fed, 63 week-old male *Fads1* KO mice (n=8) and their WT littermates (n=8), measured over 24 hours in the ER-4000 physiological measurement system (see Materials and methods). In a cold tolerance assay, 45% HFD-fed, 23-55 week-old male *Fads1* KO mice (n=18) and their WT littermates (n=17) had their **E)** rectal, **F)** interscapular and **G)** tail temperatures measured at baseline (Time=0) and then after being individually housed for 20, 40 and 60 minutes at 4°C.

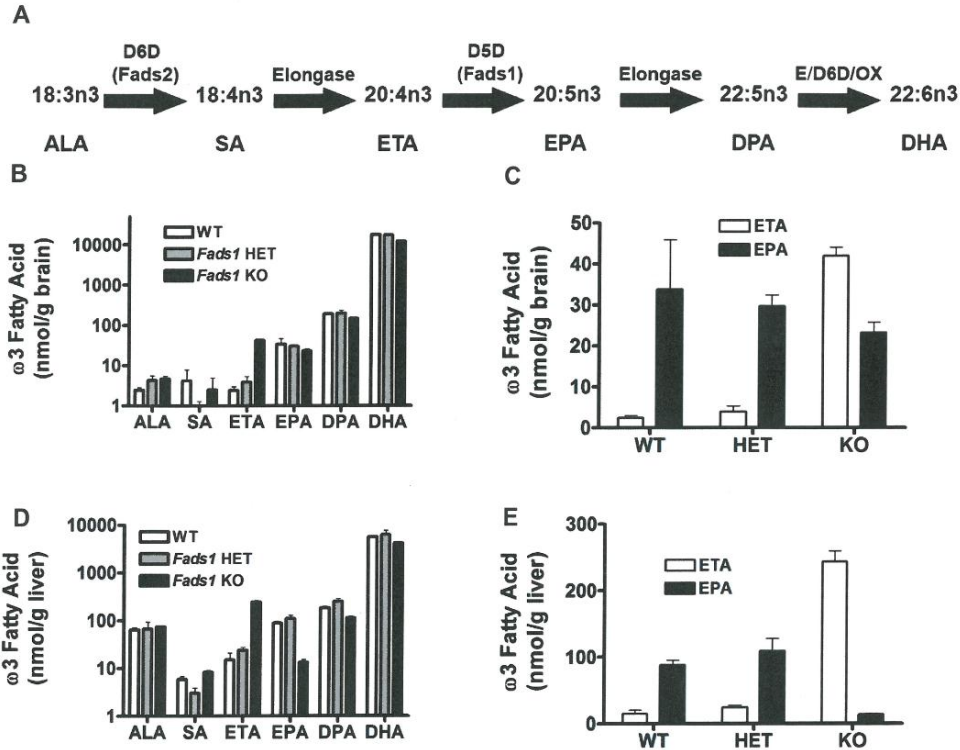

**Supplementary Figure 4. Levels of  $\omega$ 3 fatty acids present in phospholipids isolated from brain**

**and liver of *Fads1* KO, HET and WT mice.** Individual  $\omega$ 3 fatty acids were quantitated in 5 phospholipid fractions (cardiolipin, phosphatidylserine, phosphatidylethanolamine, phosphatidylcholine and lysophosphatidylcholine) isolated from brain and liver samples of 44 week-old *Fads1* KO (n=2), HET (n=2) and WT (n=2) littermate mice (see Materials and methods for details); data from the 5 phospholipid fractions were then combined to yield a single pooled value for each individual  $\omega$ 3 fatty acid in brain or liver tissue of each mouse. **A)** Enzymes and fatty acids that comprise the  $\omega$ 3 fatty acid pathway. D5D, delta 5 desaturase; D6D, delta 6 desaturase; Fads1, fatty acid desaturase 1; Fads2, fatty acid desaturase 2; E, elongase; OX, peroxisomal oxidation; ALA,  $\alpha$ -linolenic acid; SA, stearidonic acid; ETA, eicosatetraenoic acid; EPA, eicosapentaenoic acid; DPA, n3 docosapentaenoic acid; DHA, **B)** Brain levels of  $\omega$ 3 fatty acids along the  $\omega$ 3 fatty acid pathway. **C)** Brain levels of ETA and EPA, the substrate and product, respectively, of *Fads1*. **D)** Liver levels of  $\omega$ 3 fatty acids along the  $\omega$ 3 fatty acid pathway. **E)** Liver levels of ETA and EPA. All data are presented as nmol of  $\omega$ 3 fatty acid present in the 5 phospholipid fractions isolated from 1 gram of tissue.

## Supplementary Tables

Supplementary Table 1. Body composition of *Fads1* KO and WT mice at 15-20 weeks of age

| <u>Cohort</u> | <u>GT</u> | <u>N</u> | <u>Diet</u> | <u>Body weight (g)</u> | <u>Body fat (g)</u> | <u>% Body fat</u> | <u>LBM (g)</u> |
|---------------|-----------|----------|-------------|------------------------|---------------------|-------------------|----------------|
| 1M            | WT        | 11       | 60% HFD     | 40.1 ± 4.2             | 13.0 ± 4.0          | 31.7 ± 7.4        | 27.1 ± 1.2     |
| 1M            | KO        | 12       | 60% HFD     | 35.4 ± 4.0*            | 8.8 ± 2.6**         | 24.6 ± 5.8*       | 26.5 ± 2.5     |
| 1F            | WT        | 11       | 60% HFD     | 30.0 ± 3.2             | 9.7 ± 3.1           | 31.8 ± 7.7        | 20.3 ± 1.6     |
| 1F            | KO        | 8        | 60% HFD     | 28.9 ± 2.7             | 8.2 ± 1.8           | 28.2 ± 4.0        | 20.7 ± 1.0     |
| 2M            | WT        | 7        | 45% HFD     | 41.6 ± 6.6             | 11.5 ± 4.8          | 26.6 ± 8.5        | 30.1 ± 2.7     |
| 2M            | KO        | 8        | 45% HFD     | 36.6 ± 3.7             | 8.6 ± 2.0           | 23.2 ± 3.4        | 28.0 ± 1.9     |
| 3M            | WT        | 11       | Chow        | 35.6 ± 5.3             | 5.5 ± 3.1           | 14.8 ± 6.0        | 30.1 ± 2.7     |
| 3M            | KO        | 11       | Chow        | 30.1 ± 3.6**           | 3.4 ± 1.6*          | 10.9 ± 4.1        | 26.7 ± 2.5**   |
| 4M            | WT        | 17       | 45% HFD     | 40.0 ± 4.9             | 10.8 ± 2.9          | 26.6 ± 5.1        | 29.2 ± 2.8     |
| 4M            | KO        | 15       | 45% HFD     | 33.8 ± 3.0***          | 6.9 ± 1.9***        | 20.4 ± 3.9***     | 26.8 ± 2.0**   |
| 4F            | WT        | 7        | 45% HFD     | 32.9 ± 5.8             | 11.8 ± 4.1          | 35.0 ± 6.8        | 21.1 ± 2.1     |
| 4F            | KO        | 7        | 45% HFD     | 27.2 ± 43.2*           | 6.5 ± 2.2*          | 23.5 ± 5.6**      | 20.7 ± 1.5     |
| 5M            | WT        | 8        | 45% HFD     | 40.2 ± 5.4             | 11.2 ± 4.0          | 27.1 ± 7.1        | 29.0 ± 2.1     |
| 5M            | KO        | 15       | 45% HFD     | 37.1 ± 4.6             | 6.7 ± 3.1**         | 17.6 ± 6.0**      | 30.3 ± 2.0     |
| 5F            | WT        | 13       | 45% HFD     | 28.2 ± 2.8             | 7.0 ± 3.0           | 24.4 ± 8.3        | 21.2 ± 1.5     |
| 5F            | KO        | 9        | 45% HFD     | 25.2 ± 4.5             | 4.5 ± 2.8           | 17.0 ± 6.6*       | 20.7 ± 2.3     |
| 6M            | WT        | 15       | 45% HFD     | 50.4 ± 6.1             | 18.0 ± 4.0          | 35.3 ± 4.7        | 28.2 ± 2.0     |
| 6M            | KO        | 17       | 45% HFD     | 37.9 ± 6.5***          | 10.1 ± 4.5***       | 25.6 ± 6.9***     | 23.7 ± 2.2***  |
| 6F            | WT        | 14       | 45% HFD     | 38.1 ± 7.6             | 15.8 ± 5.8          | 40.1 ± 7.8        | 19.4 ± 2.0     |
| 6F            | KO        | 15       | 45% HFD     | 32.9 ± 6.8             | 11.8 ± 4.8          | 34.5 ± 7.3        | 18.3 ± 2.1     |

GT = genotype; N = number of mice; M = Male, F = female; LBM, lean body mass; HFD, high fat diet.  
 KO different from WT, \* $P < 0.05$ ; \*\*  $P < 0.01$ ; \*\*\* $P < 0.001$ .

**Supplementary Table 2. Body composition of 45% HFD-fed *Fads1* KO, HET and WT mice at 16-22 weeks of age**

| <b>Cohort</b> | <b>GT</b> | <b>N</b> | <b>Body weight (g)</b> | <b>Body fat (g)</b> | <b>% Body fat</b> | <b>LBM (g)</b> |
|---------------|-----------|----------|------------------------|---------------------|-------------------|----------------|
| 7M            | WT        | 11       | 41.7 ± 4.2             | 12.0 ± 2.1          | 28.8 ± 3.5        | 29.7 ± 3.2     |
| 7M            | HET       | 9        | 43.1 ± 5.3             | 14.6 ± 2.5          | 33.8 ± 2.7        | 28.5 ± 3.3     |
| 7M            | KO        | 14       | 35.5 ± 5.0* ++         | 8.2 ± 3.4** +++     | 22.4 ± 6.7* +++   | 27.3 ± 2.4     |
| 7F            | WT        | 6        | 32.2 ± 7.4             | 11.3 ± 6.3          | 32.4 ± 13.4       | 20.9 ± 1.3     |
| 7F            | HET       | 11       | 31.2 ± 5.9             | 9.9 ± 4.0           | 30.7 ± 7.4        | 21.3 ± 2.4     |
| 7F            | KO        | 10       | 28.1 ± 4.5             | 7.3 ± 3.1           | 25.3 ± 7.2        | 20.8 ± 2.1     |
| 8M            | WT        | 10       | 42.2 ± 5.8             | 12.0 ± 2.6          | 28.1 ± 3.0        | 30.3 ± 3.6     |
| 8M            | HET       | 8        | 38.8 ± 6.9             | 9.7 ± 4.1           | 24.1 ± 7.4        | 29.1 ± 3.9     |
| 8M            | KO        | 12       | 34.2 ± 3.8**           | 6.2 ± 2.6***        | 17.8 ± 5.9***     | 28.0 ± 2.7     |
| 8F            | WT        | 5        | 26.8 ± 3.8             | 6.5 ± 2.7           | 23.5 ± 6.8        | 20.3 ± 1.1     |
| 8F            | HET       | 7        | 30.6 ± 5.0             | 9.0 ± 3.8           | 28.3 ± 7.0        | 21.7 ± 1.3     |
| 8F            | KO        | 5        | 25.8 ± 4.0             | 4.9 ± 3.0           | 17.8 ± 8.9        | 21.0 ± 1.6     |
| 9M            | WT        | 4        | 43.5 ± 3.0             | 15.9 ± 2.2          | 36.5 ± 2.9        | 27.6 ± 1.3     |
| 9M            | HET       | 4        | 45.4 ± 7.4             | 15.1 ± 5.1          | 32.5 ± 6.0        | 30.3 ± 2.3     |
| 9M            | KO        | 4        | 37.2 ± 3.0             | 9.8 ± 3.0           | 26.2 ± 7.1        | 27.3 ± 2.0     |
| 9F            | WT        | 4        | 32.8 ± 3.8             | 11.8 ± 3.5          | 35.3 ± 6.4        | 21.1 ± 0.6     |
| 9F            | HET       | 3        | 29.1 ± 3.2             | 8.5 ± 3.0           | 28.7 ± 7.8        | 20.7 ± 2.0     |
| 9F            | KO        | 4        | 28.9 ± 1.8             | 7.7 ± 2.8           | 26.2 ± 8.4        | 21.2 ± 1.4     |

GT = genotype; N = number of mice; M = Male, F = female; LBM, lean body mass.  
 KO different from WT, \* $P < 0.05$ ; \*\*  $P < 0.01$ ; \*\*\* $P < 0.001$ .  
 KO different from HET, ++ $P < 0.01$ ; +++ $P < 0.001$ .

**Supplementary Table 3. Body composition of 16 week old *Fads1* mice generated by homologous recombination**

| <u>Cohort</u> | <u>GT</u> | <u>N</u> | <u>Diet</u> | <u>Body weight (g)</u> | <u>Body fat (g)</u> | <u>% Body fat</u> | <u>LBM (g)</u> |
|---------------|-----------|----------|-------------|------------------------|---------------------|-------------------|----------------|
| 1hrM          | WT        | 10       | 45% HFD     | 40.2 ± 3.8             | 13.5 ± 1.3          | 33.7 ± 1.1        | 26.6 ± 2.6     |
| 1hrM          | KO        | 11       | 45% HFD     | 31.6 ± 3.1***          | 5.7 ± 2.2***        | 17.8 ± 5.5***     | 25.9 ± 1.9     |
| 1hrF          | WT        | 8        | 45% HFD     | 27.5 ± 6.1             | 7.5 ± 4.9           | 25.4 ± 11.1       | 20.0 ± 2.1     |
| 1hrF          | KO        | 11       | 45% HFD     | 24.0 ± 4.3             | 4.5 ± 2.0           | 17.9 ± 5.2        | 19.5 ± 2.5     |

GT = genotype; N = number of mice; M = Male; F = Female; hr, homologous recombination; LBM, lean body mass.

KO different from WT, \* $P < 0.05$ ; \*\* $P < 0.01$ ; \*\*\* $P < 0.001$ .

**Supplementary Table 4. Body composition of 45% HFD-fed *Fads1* KO and WT mice at age > 1 year**

| <u>Cohort</u> | <u>GT</u> | <u>Age (wks)</u> | <u>N</u> | <u>Body weight (g)</u> | <u>Body fat (g)</u> | <u>% Body fat</u> | <u>LBM (g)</u> |
|---------------|-----------|------------------|----------|------------------------|---------------------|-------------------|----------------|
| 5M            | WT        | 66               | 6        | 56.1 ± 7.3             | 21.8 ± 5.2          | 38.4 ± 4.7        | 34.3 ± 2.7     |
| 5M            | KO        | 66               | 7        | 47.4 ± 12.2            | 14.4 ± 8.4          | 28.5 ± 10.0*      | 33.0 ± 4.2     |
| 1hrM          | WT        | 74-75            | 9        | 67.4 ± 6.2             | 30.3 ± 5.3          | 44.6 ± 3.9        | 37.1 ± 1.3     |
| 1hrM          | KO        | 74-75            | 9        | 39.7 ± 7.0***          | 9.8 ± 5.6***        | 23.4 ± 8.9***     | 29.8 ± 3.3***  |
| 1hrF          | WT        | 74-75            | 7        | 44.5 ± 18.7            | 18.9 ± 14.5         | 37.1 ± 15.6       | 25.6 ± 4.7     |
| 1hrF          | KO        | 74-75            | 4        | 35.4 ± 6.8             | 12.2 ± 3.3          | 34.1 ± 5.1        | 23.2 ± 4.0     |

GT = genotype; N = number of mice; wks = weeks; M = Male; F = Female; hr = homologous recombination; LBM, lean body mass.

KO different from WT, \* $P < 0.05$ ; \*\*  $P < 0.01$ ; \*\*\* $P < 0.001$ .



**Supplementary Table 5. Serum total triglyceride, total cholesterol, ALT and AST levels and liver weights in Fads1 KO mice**

| <u>Cohort</u> | <u>GT</u> | <u>Age</u> | <u>N</u> | <u>TG (mg/dL)</u> | <u>Chol (mg/dL)</u> | <u>Liver Wt (g)</u> | <u>ALT (U/L)</u> | <u>AST (U/L)</u> |
|---------------|-----------|------------|----------|-------------------|---------------------|---------------------|------------------|------------------|
| 5M            | WT        | 30 wks     | 8        | 170 ± 41          | 248 ± 74            |                     |                  |                  |
| 5M            | KO        | 30 wks     | 15       | 121 ± 46*         | 154 ± 40***         |                     |                  |                  |
| 6M            | WT        | 30 wks     | 10       | 90 ± 27           | 251 ± 48            | 2.8 ± 0.7           | 240 ± 119        | 232 ± 118        |
| 6M            | KO        | 30 wks     | 10       | 67 ± 20*          | 143 ± 42***         | 1.4 ± 0.4***        | 74 ± 56***       | 125 ± 53*        |
| 6F            | WT        | 30 wks     | 10       | 47 ± 12           | 188 ± 41            | 1.4 ± 0.3           | 138 ± 103        | 268 ± 346        |
| 6F            | KO        | 30 wks     | 10       | 55 ± 32           | 141 ± 41*           | 1.3 ± 0.2           | 58 ± 33*         | 265 ± 275        |
| 7M            | WT        | 37 wks     | 9        | 158 ± 37          | 219 ± 48            |                     |                  |                  |
| 7M            | KO        | 37 wks     | 10       | 139 ± 32          | 174 ± 15*           |                     |                  |                  |
| 7F            | WT        | 37 wks     | 6        | 127 ± 24          | 158 ± 33            |                     |                  |                  |
| 7F            | KO        | 37 wks     | 9        | 116 ± 43          | 121 ± 25*           |                     |                  |                  |
| 8M            | WT        | 46 wks     | 6        | 121 ± 49          | 215 ± 73            |                     |                  |                  |
| 8M            | KO        | 46 wks     | 10       | 91 ± 37           | 135 ± 41*           |                     |                  |                  |
| 8F            | WT        | 46 wks     | 3        | 85 ± 34           | 106 ± 10            |                     |                  |                  |
| 8F            | KO        | 46 wks     | 3        | 77 ± 18           | 92 ± 25             |                     |                  |                  |
| 1hrM          | WT        | 31 wks     | 10       | 193 ± 42          | 242 ± 46            |                     |                  |                  |
| 1hrM          | KO        | 31 wks     | 11       | 141 ± 49*         | 166 ± 43***         |                     |                  |                  |
| 1hrF          | WT        | 31 wks     | 8        | 111 ± 20          | 106 ± 27            |                     |                  |                  |
| 1hrF          | KO        | 31 wks     | 11       | 98 ± 16           | 115 ± 48            |                     |                  |                  |

GT = genotype; N = number of mice; TG, total triglyceride; Chol, total cholesterol; Wt, weight; ALT, alanine aminotransferase; AST, aspartate aminotransferase; wks, weeks  
 KO different from WT, \* $P < 0.05$ ; \*\*\* $P < 0.001$ .

**Supplementary Table 6. Body weight and lipid levels in *Fads1* KO and WT mice on an *ApoE* KO background**

| Measurement        | Time on western diet | Males      |                      | Females    |                      |
|--------------------|----------------------|------------|----------------------|------------|----------------------|
|                    |                      | WT (17)    | <i>Fads1</i> KO (16) | WT (21)    | <i>Fads1</i> KO (15) |
| Body weight (g)    | 4 weeks              | 29.0 ± 3.6 | 27.8 ± 4.4           | 22.9 ± 2.7 | 21.8 ± 2.0           |
| Body weight (g)    | 8 weeks              | 36.1 ± 4.6 | 30.8 ± 4.0**         | 25.3 ± 2.4 | 23.7 ± 3.2           |
| Body weight (g)    | 12 weeks             | 41.8 ± 6.2 | 33.8 ± 4.9***        | 28.0 ± 3.3 | 25.3 ± 3.7*          |
| Total Chol (ng/mL) | 4 weeks              | 983 ± 244  | 1037 ± 212           | 870 ± 138  | 950 ± 132            |
| Total Chol (ng/mL) | 8 weeks              | 1149 ± 218 | 1210 ± 271           | 1066 ± 248 | 1113 ± 245           |
| Total Chol (ng/mL) | 12 weeks             | 1129 ± 247 | 1061 ± 274           | 1015 ± 217 | 1002 ± 243           |
| Total TG (ng/mL)   | 4 weeks              | 213 ± 51   | 193 ± 59             | 179 ± 60   | 173 ± 52             |
| Total TG (ng/mL)   | 8 weeks              | 177 ± 64   | 181 ± 66             | 157 ± 68   | 141 ± 48             |
| Total TG (ng/mL)   | 12 weeks             | 197 ± 53   | 182 ± 54             | 155 ± 53   | 135 ± 45             |

(N) = number of mice; Chol = cholesterol.

KO different from WT, \*P < 0.05; \*\* P < 0.01; \*\*\*P < 0.001.
